# Supplementary material for: Carcinogenic Parasite Secretes Growth Factor That Accelerates Wound Healing and Potentially Promotes Neoplasia
Source: PLoS Pathog. 2015 Oct 20;11(10):e1005209. doi: 10.1371/journal.ppat.1005209 (PMC4618121; doi:10.1371/journal.ppat.1005209)
Supplement: S1 Table — (XLSX) [file ppat.1005209.s005.xlsx]

## Sheet: Supplementary Table1
Table S1. Validation of cholangiocyte proteins for which expression levels changed significantly after exposure to rOv-GRN-1; related to Figure 4.										FOLD REGULATION (log2)
	#	Visible?	Starred?	Identified Proteins (241)	Accession Number	Molecular Weight	Protein Grouping Ambiguity	Kruskal-Wallis Test (P-Value)	Taxonomy	Reference	0.5h	1h	4h	8h	16h	24h	48h
	1	TRUE	Empty	Vimentin OS=Homo sapiens GN=VIM PE=1 SV=4 (P08670)	P08670	54 kDa	TRUE	95% (< 0.0001)	unknown	0	1.1	0.9	0.9	0.9	0	0.1	0.2
	2	TRUE	Empty	Neuroblast differentiation-associated protein AHNAK OS=Homo sapiens GN=AHNAK PE=1 SV=2	Q09666	629 kDa		95% (< 0.0001)	unknown	0	0.8	0.8	0.5	0.9	0	0.1	-0.2
	3	TRUE	Empty	Myosin-9 OS=Homo sapiens GN=MYH9 PE=1 SV=4 (P35579)	P35579	227 kDa	TRUE	95% (< 0.0001)	unknown	0	1.4	1.4	1.1	1.6	-0.4	-0.3	-0.3
	4	TRUE	Empty	Spectrin alpha chain, non-erythrocytic 1 OS=Homo sapiens GN=SPTAN1 PE=1 SV=3	Q13813	285 kDa	TRUE	95% (< 0.0001)	unknown	0	1.5	1.7	1.5	1.8	0.1	0.1	-0.6
	5	TRUE	Empty	Prelamin-A/C OS=Homo sapiens GN=LMNA PE=1 SV=1	P02545	74 kDa	TRUE	95% (< 0.0001)	unknown	0	1.2	1.2	0.9	1.2	0.1	0.2	0.3
	6	TRUE	Empty	Fructose-bisphosphate aldolase A OS=Homo sapiens GN=ALDOA PE=1 SV=2	P04075	39 kDa		95% (< 0.0001)	unknown	0	1	1	0.7	0.8	-0.2	-0.4	-0.3
	7	TRUE	Empty	Annexin A2 OS=Homo sapiens GN=ANXA2 PE=1 SV=2	P07355	39 kDa		95% (< 0.0001)	unknown	0	0.5	0.2	0.1	0.2	0.1	-0.3	-0.4
	8	TRUE	Empty	Protein disulfide-isomerase A4 OS=Homo sapiens GN=PDIA4 PE=1 SV=2	P13667	73 kDa		95% (< 0.0001)	unknown	0	1.5	1.6	1.4	1.6	0.3	0.1	-0.1
	9	TRUE	Empty	Heat shock protein HSP 90-beta OS=Homo sapiens GN=HSP90AB1 PE=1 SV=4 (P08238)	P08238	83 kDa	TRUE	95% (< 0.0001)	unknown	0	1	1.3	0.9	1.3	0	0	-0.1
	10	TRUE	Empty	Annexin A5 OS=Homo sapiens GN=ANXA5 PE=1 SV=2	P08758	36 kDa		95% (< 0.0001)	unknown	0	1.4	1.5	1.3	1.5	0	0.3	0.4
	11	TRUE	Empty	14-3-3 protein zeta/delta OS=Homo sapiens GN=YWHAZ PE=1 SV=1 (P63104)	P63104	28 kDa	TRUE	95% (< 0.0001)	unknown	0	1.4	1.2	1.1	1.3	0.5	0.4	0.3
	12	TRUE	Empty	Moesin OS=Homo sapiens GN=MSN PE=1 SV=3 (P26038)	P26038	68 kDa	TRUE	95% (< 0.0001)	unknown	0	1.5	1.4	1.3	1.3	0.3	-0.1	-0.2
	13	TRUE	Empty	Keratin, type I cytoskeletal 18 OS=Homo sapiens GN=KRT18 PE=1 SV=2 (P05783)	P0578	48 kDa	TRUE	95% (< 0.0001)	unknown	0	1.4	1	1.1	1.5	0.1	0.6	0.6
	14	TRUE	Empty	Tubulin beta chain OS=Homo sapiens GN=TUBB PE=1 SV=2 (P07437)	P07437	50 kDa	TRUE	95% (< 0.0001)	unknown	0	1	1.6	0.9	1.4	0.2	0.2	0.3
	15	TRUE	Empty	Triosephosphate isomerase OS=Homo sapiens GN=TPI1 PE=1 SV=3	P60174	31 kDa		95% (< 0.0001)	unknown	0	0.8	0.8	0.6	1	-0.1	0.5	0.3
	16	TRUE	Empty	Filamin-A OS=Homo sapiens GN=FLNA PE=1 SV=4 (P21333)	P21333	281 kDa	TRUE	95% (< 0.0001)	unknown	0	0.7	1.1	1.1	1	-0.2	-0.2	-0.4
	17	TRUE	Empty	60 kDa heat shock protein, mitochondrial OS=Homo sapiens GN=HSPD1 PE=1 SV=2	P10809	61 kDa		95% (< 0.0001)	unknown	0	1	1	1	1.3	0	-0.1	0
	18	TRUE	Empty	10 kDa heat shock protein, mitochondrial OS=Homo sapiens GN=HSPE1 PE=1 SV=2	P61604	11 kDa		95% (< 0.0001)	unknown	0	1.4	1.3	1.2	1.5	0	0.7	0.8
	19	TRUE	Empty	Transgelin-2 OS=Homo sapiens GN=TAGLN2 PE=1 SV=3 (P37802)	P37802	22 kDa	TRUE	95% (< 0.0001)	unknown	0	1.1	1.3	0.9	1	0.3	0.1	0.4
	20	TRUE	Empty	Stathmin OS=Homo sapiens GN=STMN1 PE=1 SV=3	P16949	17 kDa		95% (0.00011)	unknown	0	1	1.4	1	1.4	0.2	1	0.6
	21	TRUE	Empty	Elongation factor 1-alpha 1 OS=Homo sapiens GN=EEF1A1 PE=1 SV=1 (P68104)	P68104	50 kDa	TRUE	95% (0.00013)	unknown	0	0.9	0.9	0.5	0.8	-0.5	-0.2	-0.3
	22	TRUE	Empty	Heterogeneous nuclear ribonucleoprotein K OS=Homo sapiens GN=HNRNPK PE=1 SV=1	P61978	51 kDa		95% (0.00015)	unknown	0	1.4	1.2	0.8	1.3	-0.2	0.2	0.2
	23	TRUE	Empty	Protein disulfide-isomerase A3 OS=Homo sapiens GN=PDIA3 PE=1 SV=4	P30101	57 kDa		95% (0.00022)	unknown	0	1.2	1.2	1.1	1.4	0	0.5	0.5
	24	TRUE	Empty	Heat shock cognate 71 kDa protein OS=Homo sapiens GN=HSPA8 PE=1 SV=1 (P11142)	P11142	71 kDa	TRUE	95% (0.00022)	unknown	0	1	1.2	0.9	1.3	-0.1	-0.1	0.1
	25	TRUE	Empty	Stress-induced-phosphoprotein 1 OS=Homo sapiens GN=STIP1 PE=1 SV=1	P31948	63 kDa		95% (0.00033)	unknown	0	0.7	0.6	0.6	0.9	-1	-0.6	-0.6
	26	TRUE	Empty	78 kDa glucose-regulated protein OS=Homo sapiens GN=HSPA5 PE=1 SV=2	P11021	72 kDa	TRUE	95% (0.00033)	unknown	0	1.1	1.2	0.7	1.2	-0.3	-0.2	0.4
	27	TRUE	Empty	Glyceraldehyde-3-phosphate dehydrogenase OS=Homo sapiens GN=GAPDH PE=1 SV=3 (P04406)	P04406	36 kDa	TRUE	95% (0.00034)	unknown	0	0.3	0.3	0.4	0.5	0.1	0.2	-0.1
	28	TRUE	Empty	Stress-70 protein, mitochondrial OS=Homo sapiens GN=HSPA9 PE=1 SV=2	P38646	74 kDa	TRUE	95% (0.00051)	unknown	0	1.9	1.6	1.4	1.9	-0.1	0.7	0.3
	29	TRUE	Empty	Transitional endoplasmic reticulum ATPase OS=Homo sapiens GN=VCP PE=1 SV=4	P55072	89 kDa		95% (0.00061)	unknown	0	1.1	1.2	1.3	1.3	0	-1.1	-0.5
	30	TRUE	Empty	Heat shock protein beta-1 OS=Homo sapiens GN=HSPB1 PE=1 SV=2	P04792	23 kDa		95% (0.00069)	unknown	0	1.1	1	0.7	1.3	-0.3	0.3	0.1
	31	TRUE	Empty	Splicing factor, proline- and glutamine-rich OS=Homo sapiens GN=SFPQ PE=1 SV=2	P23246	76 kDa	TRUE	95% (0.00072)	unknown	0	1.9	1.9	1.9	1.9	0.2	1.1	0.1
	32	TRUE	Empty	Peroxiredoxin-6 OS=Homo sapiens GN=PRDX6 PE=1 SV=3	P30041	25 kDa		95% (0.00082)	unknown	0	1.6	1.4	1.5	1.9	0.5	0.3	0.4
	33	TRUE	Empty	Protein disulfide-isomerase OS=Homo sapiens GN=P4HB PE=1 SV=3	P07237	57 kDa		95% (0.0010)	unknown	0	1.2	1.1	0.8	1.2	-0.2	0.2	-0.2
	34	TRUE	Empty	Non-POU domain-containing octamer-binding protein OS=Homo sapiens GN=NONO PE=1 SV=4	Q15233	54 kDa	TRUE	95% (0.0012)	unknown	0	1.8	1.9	1.9	2.2	0.2	0.5	0.3
	35	TRUE	Empty	T-complex protein 1 subunit theta OS=Homo sapiens GN=CCT8 PE=1 SV=4	P50990	60 kDa		95% (0.0013)	unknown	0	1.8	1.6	1.9	2.3	0.4	0.7	0.3
	36	TRUE	Empty	Pyruvate kinase PKM OS=Homo sapiens GN=PKM PE=1 SV=4 (P14618)	P14618	58 kDa	TRUE	95% (0.0016)	unknown	0	1.4	1.2	0.8	1.2	-0.3	-0.4	-0.4
	37	TRUE	Empty	Far upstream element-binding protein 2 OS=Homo sapiens GN=KHSRP PE=1 SV=4	Q92945	73 kDa	TRUE	95% (0.0030)	unknown	0	1.2	1.6	1.4	1.1	-0.1	-0.2	0.5
	38	TRUE	Empty	Endoplasmin OS=Homo sapiens GN=HSP90B1 PE=1 SV=1	P14625	92 kDa		95% (0.0035)	unknown	0	0.8	0.6	0.4	0.5	-1	-0.3	0.1
	39	TRUE	Empty	Tropomyosin alpha-4 chain OS=Homo sapiens GN=TPM4 PE=1 SV=3 (P67936)	P67936	29 kDa	TRUE	95% (0.0036)	unknown	0	1	0.7	0.5	0.6	0.2	0.3	0.7
	40	TRUE	Empty	Peptidyl-prolyl cis-trans isomerase A OS=Homo sapiens GN=PPIA PE=1 SV=2	P62937	18 kDa	TRUE	95% (0.0042)	unknown	0	0.9	0.7	0.2	0.7	-0.1	0	0
	41	TRUE	Empty	Profilin-1 OS=Homo sapiens GN=PFN1 PE=1 SV=2	P07737	15 kDa		95% (0.0049)	unknown	0	0.7	0.9	0.6	0.9	0.6	0.3	0.1
	42	TRUE	Empty	Elongation factor 2 OS=Homo sapiens GN=EEF2 PE=1 SV=4	P13639	95 kDa	TRUE	95% (0.0051)	unknown	0	0.7	1	1	0.9	-0.3	-0.6	-0.9
	43	TRUE	Empty	Heterogeneous nuclear ribonucleoproteins A2/B1 OS=Homo sapiens GN=HNRNPA2B1 PE=1 SV=2	P22626	37 kDa		95% (0.0064)	unknown	0	0.8	0.7	0.5	0.8	0.1	0	0
	44	TRUE	Empty	Glucosidase 2 subunit beta OS=Homo sapiens GN=PRKCSH PE=1 SV=2	P14314	59 kDa		95% (0.0067)	unknown	0	1.3	1.1	1.4	1.6	0.8	-0.2	0.8
	45	TRUE	Empty	Putative RNA-binding protein Luc7-like 2 OS=Homo sapiens GN=LUC7L2 PE=1 SV=2	Q9Y383	47 kDa		95% (0.0074)	unknown	0	0.5	0.4	0.1	1.1	-1.6	-1.8	-0.8
	46	TRUE	Empty	40S ribosomal protein SA OS=Homo sapiens GN=RPSA PE=1 SV=4	P08865	33 kDa	TRUE	95% (0.0077)	unknown	0	0.4	0.8	0.6	0.3	-1.5	-0.7	-0.4
	47	TRUE	Empty	Polymerase I and transcript release factor OS=Homo sapiens GN=PTRF PE=1 SV=1	Q6NZI2	43 kDa		95% (0.0079)	unknown	0	1.3	1.4	1	1.4	-0.9	-0.2	0.3
	48	TRUE	Empty	Alpha-enolase OS=Homo sapiens GN=ENO1 PE=1 SV=2	P06733	47 kDa		95% (0.0080)	unknown	0	0.7	0.4	0.3	0.7	-0.2	0	-0.2
	49	TRUE	Empty	Phosphoglycerate kinase 1 OS=Homo sapiens GN=PGK1 PE=1 SV=3	P00558	45 kDa		95% (0.0083)	unknown	0	0.7	0.5	0.7	0.8	-0.2	-0.5	-0.3
	50	TRUE	Empty	L-lactate dehydrogenase B chain OS=Homo sapiens GN=LDHB PE=1 SV=2	P07195	37 kDa	TRUE	95% (0.011)	unknown	0	1.4	0.8	0.8	1.3	0.3	0	-0.5
	51	TRUE	Empty	40S ribosomal protein S16 OS=Homo sapiens GN=RPS16 PE=1 SV=2	P62249	16 kDa		95% (0.011)	unknown	0	0.9	1	0.6	0.9	-0.5	-0.3	-0.3
	52	TRUE	Empty	Adenylyl cyclase-associated protein 1 OS=Homo sapiens GN=CAP1 PE=1 SV=5	Q01518	52 kDa		95% (0.011)	unknown	0	1.5	1.2	1.4	1.6	-1.3	-0.1	-0.7
	53	TRUE	Empty	Probable ATP-dependent RNA helicase DDX17 OS=Homo sapiens GN=DDX17 PE=1 SV=2 (Q92841)	Q92841	80 kDa	TRUE	95% (0.012)	unknown	0	1.3	1.1	0.9	1.8	-0.5	0.2	-0.1
	54	TRUE	Empty	60S ribosomal protein L13 OS=Homo sapiens GN=RPL13 PE=1 SV=4	P26373	24 kDa		95% (0.014)	unknown	0	1.8	1.6	1.6	1.7	0.1	0.1	0.2
	55	TRUE	Empty	Actin, cytoplasmic 1 OS=Homo sapiens GN=ACTB PE=1 SV=1 (P60709)	P60709	42 kDa	TRUE	95% (0.014)	unknown	0	0	-0.1	0	0.1	-0.4	-0.4	-0.6
	56	TRUE	Empty	Nucleolin OS=Homo sapiens GN=NCL PE=1 SV=3	P19338	77 kDa		95% (0.016)	unknown	0	1.2	0.8	0.9	1.1	0.4	0.4	0.5
	57	TRUE	Empty	Plectin OS=Homo sapiens GN=PLEC PE=1 SV=3	Q15149	532 kDa	TRUE	95% (0.018)	unknown	0	0.9	1	0.7	1.3	0.2	0	-0.3
	58	TRUE	Empty	Alpha-2-HS-glycoprotein OS=Homo sapiens GN=AHSG PE=1 SV=1	P02765	39 kDa		95% (0.019)	unknown	0	1.3	1.5	1.2	1.4	0.2	0.7	0.5
	59	TRUE	Empty	Heterogeneous nuclear ribonucleoprotein A3 OS=Homo sapiens GN=HNRNPA3 PE=1 SV=2	P51991	40 kDa	TRUE	95% (0.020)	unknown	0	2.7	1.7	2.5	2.6	1	-0.8	0.8
	60	TRUE	Empty	Hemoglobin subunit alpha OS=Homo sapiens GN=HBA1 PE=1 SV=2	P69905	15 kDa		95% (0.023)	unknown	0	1	1.1	0.9	1.3	0.5	0.9	0.5
	61	TRUE	Empty	Small nuclear ribonucleoprotein-associated protein N OS=Homo sapiens GN=SNRPN PE=1 SV=1 (P63162)	P63162	25 kDa	TRUE	95% (0.023)	unknown	0	1.3	1.5	1.4	1.3	0.2	0	-0.1
	62	TRUE	Empty	Heterogeneous nuclear ribonucleoproteins C1/C2 OS=Homo sapiens GN=HNRNPC PE=1 SV=4	P07910	34 kDa		75% (0.024)	unknown	0	1.3	1.2	1.6	1.4	0.4	0.7	0.7
	63	TRUE	Empty	40S ribosomal protein S13 OS=Homo sapiens GN=RPS13 PE=1 SV=2	P62277	17 kDa	TRUE	95% (0.024)	unknown	0	1.3	2.1	1.6	2	-0.1	0.1	-0.5
	64	TRUE	Empty	Protein-glutamine gamma-glutamyltransferase 2 OS=Homo sapiens GN=TGM2 PE=1 SV=2	P21980	77 kDa		95% (0.025)	unknown	0	0.9	1	1	1.5	-0.5	-0.4	-1.3
	65	TRUE	Empty	THO complex subunit 4 OS=Homo sapiens GN=ALYREF PE=1 SV=3	Q86V81	27 kDa		95% (0.025)	unknown	0	2.4	2.2	1.6	2.5	-0.5	-0.2	0.1
	66	TRUE	Empty	Ribosome-binding protein 1 OS=Homo sapiens GN=RRBP1 PE=1 SV=4	Q9P2E9	152 kDa	TRUE	95% (0.026)	unknown	0	1.1	1	1	1	-0.1	0.4	0.1
	67	TRUE	Empty	Cofilin-1 OS=Homo sapiens GN=CFL1 PE=1 SV=3	P23528	19 kDa	TRUE	75% (0.027)	unknown	0	1.5	0.8	0.8	1.6	0.6	0.8	1.2
	68	TRUE	Empty	Malate dehydrogenase, mitochondrial OS=Homo sapiens GN=MDH2 PE=1 SV=3	P40926	36 kDa		95% (0.027)	unknown	0	2	1.7	1.4	1.6	1.1	0.3	0.3
	69	TRUE	Empty	40S ribosomal protein S19 OS=Homo sapiens GN=RPS19 PE=1 SV=2	P39019	16 kDa		95% (0.028)	unknown	0	0.9	1	0.4	1	0.7	0.6	0.5
	70	TRUE	Empty	Calnexin OS=Homo sapiens GN=CANX PE=1 SV=2	P27824	68 kDa		95% (0.031)	unknown	0	0.9	1.1	0.6	1	0.6	-0.4	0.5
	71	TRUE	Empty	Alpha-actinin-4 OS=Homo sapiens GN=ACTN4 PE=1 SV=2 (O43707)	O43707	105 kDa	TRUE	75% (0.036)	unknown	0	0.7	0.9	0.7	1.2	-0.2	0.1	0.4
	72	TRUE	Empty	Nicotinamide N-methyltransferase OS=Homo sapiens GN=NNMT PE=1 SV=1	P40261	30 kDa		95% (0.041)	unknown	0	1.5	1.6	1.3	1.5	0.2	0.1	-0.1
	73	TRUE	Empty	ATP synthase subunit beta, mitochondrial OS=Homo sapiens GN=ATP5B PE=1 SV=3	P06576	57 kDa		95% (0.043)	unknown	0	1.1	1.1	0.7	1.1	0.3	0.7	0.1
	74	TRUE	Empty	60S ribosomal protein L10a OS=Homo sapiens GN=RPL10A PE=1 SV=2	P62906	25 kDa		95% (0.047)	unknown	0	1.2	1.2	0.6	1.2	-2.2	0.1	1
	75	TRUE	Empty	Citrate synthase, mitochondrial OS=Homo sapiens GN=CS PE=1 SV=2	O75390	52 kDa		95% (0.048)	unknown	0	1.5	2.2	1.6	2.3	0.6	0.7	1.1
	76	TRUE	Empty	60S acidic ribosomal protein P0-like OS=Homo sapiens GN=RPLP0P6 PE=5 SV=1 (Q8NHW5)	Q8NHW5	34 kDa	TRUE	0% (0.054)	unknown	0	0.6	0	-0.1	0.5	-0.7	-1.2	-0.7
	77	TRUE	Empty	Galectin-1 OS=Homo sapiens GN=LGALS1 PE=1 SV=2	P09382	15 kDa		75% (0.058)	unknown	0	1.7	1.5	1.2	1.7	0.8	0.7	0.8
	78	TRUE	Empty	40S ribosomal protein S26 OS=Homo sapiens GN=RPS26 PE=1 SV=3	P62854	13 kDa		75% (0.059)	unknown	0	0.9	1.3	1.6	1.5	-0.5	-0.3	-0.5
	79	TRUE	Empty	Hsp90 co-chaperone Cdc37 OS=Homo sapiens GN=CDC37 PE=1 SV=1	Q16543	44 kDa		75% (0.063)	unknown	0	2.9	3.2	3	3.6	0.5	0.8	2.3
	80	TRUE	Empty	Tubulin-folding cofactor B OS=Homo sapiens GN=TBCB PE=1 SV=2	Q99426	27 kDa		75% (0.064)	unknown	0	1.2	1.1	1.5	1.5	-0.2	-0.2	-0.2
	81	TRUE	Empty	Ubiquitin-conjugating enzyme E2 N OS=Homo sapiens GN=UBE2N PE=1 SV=1	P61088	17 kDa		75% (0.064)	unknown	0	1.4	1.8	1.3	2	0.8	0.9	0.4
	82	TRUE	Empty	L-lactate dehydrogenase A chain OS=Homo sapiens GN=LDHA PE=1 SV=2 (P00338)	P00338	37 kDa	TRUE	0% (0.065)	unknown	0	0.1	0.1	0.2	0.2	-0.3	-0.5	-1
	83	TRUE	Empty	Malate dehydrogenase, cytoplasmic OS=Homo sapiens GN=MDH1 PE=1 SV=4	P40925	36 kDa		75% (0.066)	unknown	0	0.6	0.3	0.2	0.5	-0.5	-1.5	-1.7
	84	TRUE	Empty	40S ribosomal protein S12 OS=Homo sapiens GN=RPS12 PE=1 SV=3	P25398	15 kDa		75% (0.067)	unknown	0	2.4	2.5	2.2	2.5	0.6	1.3	0.8
	85	TRUE	Empty	60S ribosomal protein L23a OS=Homo sapiens GN=RPL23A PE=1 SV=1	P62750	18 kDa		75% (0.067)	unknown	0	0.3	0.5	0.1	0.5	-1.9	-0.7	-0.7
	86	TRUE	Empty	Adenosylhomocysteinase OS=Homo sapiens GN=AHCY PE=1 SV=4	P23526	48 kDa		75% (0.068)	unknown	0	1.6	2.5	1.4	2.1	0.1	-0.4	0.3
	87	TRUE	Empty	Flavin reductase (NADPH) OS=Homo sapiens GN=BLVRB PE=1 SV=3	P30043	22 kDa		75% (0.068)	unknown	0	1.6	2	1.7	2.1	-0.7	-0.6	0.3
	88	TRUE	Empty	Neutral alpha-glucosidase AB OS=Homo sapiens GN=GANAB PE=1 SV=3	Q14697	107 kDa		75% (0.068)	unknown	0	0.8	1.2	0.7	1	-1.2	-0.3	-0.6
	89	TRUE	Empty	Elongation factor 1-delta OS=Homo sapiens GN=EEF1D PE=1 SV=5	P29692	31 kDa	TRUE	0% (0.071)	unknown	0	1.8	1.6	1.7	1.4	0.7	0.6	0.9
	90	TRUE	Empty	Serine/arginine-rich splicing factor 3 OS=Homo sapiens GN=SRSF3 PE=1 SV=1	P84103	19 kDa		75% (0.075)	unknown	0	1.6	1.8	1.5	1.4	0.2	0	0.5
	91	TRUE	Empty	Nucleosome assembly protein 1-like 4 OS=Homo sapiens GN=NAP1L4 PE=1 SV=1 (Q99733)	Q99733	43 kDa	TRUE	75% (0.075)	unknown	0	1	1.9	1.2	1.7	-1.4	-0.7	0.4
	92	TRUE	Empty	Calreticulin OS=Homo sapiens GN=CALR PE=1 SV=1	P27797	48 kDa		0% (0.075)	unknown	0	0.6	1	0.6	0.9	-0.8	0	-0.3
	93	TRUE	Empty	Annexin A6 OS=Homo sapiens GN=ANXA6 PE=1 SV=3	P08133	76 kDa		75% (0.077)	unknown	0	1.8	2	2.1	2.4	-0.2	-1.2	-0.4
	94	TRUE	Empty	Catenin delta-1 OS=Homo sapiens GN=CTNND1 PE=1 SV=1	O60716	108 kDa		75% (0.077)	unknown	0	1.8	1.5	1.2	1.9	-0.3	-0.8	-0.6
	95	TRUE	Empty	Zyxin OS=Homo sapiens GN=ZYX PE=1 SV=1	Q15942	61 kDa		75% (0.079)	unknown	0	0.3	-0.2	-0.9	0.3	-0.2	-1.1	-0.3
	96	TRUE	Empty	Alpha-fetoprotein OS=Homo sapiens GN=AFP PE=1 SV=1	P02771	69 kDa		75% (0.079)	unknown	0	0.8	1.2	1.3	1.1	-0.2	-0.5	0.2
	97	TRUE	Empty	Voltage-dependent anion-selective channel protein 1 OS=Homo sapiens GN=VDAC1 PE=1 SV=2	P21796	31 kDa		75% (0.080)	unknown	0	1.7	0.6	1.3	1.3	0.2	-1.1	-1.1
	98	TRUE	Empty	40S ribosomal protein S14 OS=Homo sapiens GN=RPS14 PE=1 SV=3	P62263	16 kDa		75% (0.081)	unknown	0	1	1	0.9	1.2	0.9	0.8	0.4
	99	TRUE	Empty	60S ribosomal protein L17 OS=Homo sapiens GN=RPL17 PE=1 SV=3	P18621	21 kDa	TRUE	75% (0.082)	unknown	0	0.9	0.8	1.2	0.7	-0.4	-0.5	-0.4
	100	TRUE	Empty	Poly(rC)-binding protein 1 OS=Homo sapiens GN=PCBP1 PE=1 SV=2	Q15365	37 kDa		75% (0.082)	unknown	0	2.4	2.7	2.1	2.6	0.4	0.5	1
	101	TRUE	Empty	Proactivator polypeptide OS=Homo sapiens GN=PSAP PE=1 SV=2	P07602	58 kDa		75% (0.082)	unknown	0	1.6	1.8	1.2	1.9	-0.5	1	0.1
	102	TRUE	Empty	CD44 antigen OS=Homo sapiens GN=CD44 PE=1 SV=3	P16070	82 kDa		0% (0.085)	unknown	0	0.8	0.7	0.5	1	-0.3	-0.2	0.1
	103	TRUE	Empty	T-complex protein 1 subunit epsilon OS=Homo sapiens GN=CCT5 PE=1 SV=1	P48643	60 kDa		75% (0.086)	unknown	0	1.5	2.9	1.9	3	0	0.6	0.8
	104	TRUE	Empty	Elongation factor 1-beta OS=Homo sapiens GN=EEF1B2 PE=1 SV=3	P24534	25 kDa	TRUE	0% (0.086)	unknown	0	-0.4	-0.3	-1.2	-0.5	-0.1	0.1	-0.6
	105	TRUE	Empty	Chloride intracellular channel protein 1 OS=Homo sapiens GN=CLIC1 PE=1 SV=4	O00299	27 kDa	TRUE	75% (0.088)	unknown	0	1.4	1.9	1.7	2	0	1	0.3
	106	TRUE	Empty	Cytochrome c OS=Homo sapiens GN=CYCS PE=1 SV=2	P99999	12 kDa		75% (0.088)	unknown	0	1.9	2	1.8	2	1.3	1.2	1.3
	107	TRUE	Empty	40S ribosomal protein S23 OS=Homo sapiens GN=RPS23 PE=1 SV=3	P62266	16 kDa		75% (0.092)	unknown	0	0.8	0.7	0.4	0.9	-1.4	-0.3	-0.5
	108	TRUE	Empty	Proteasome activator complex subunit 2 OS=Homo sapiens GN=PSME2 PE=1 SV=4	Q9UL46	27 kDa		75% (0.096)	unknown	0	1	1	1	1.2	-0.6	-1.1	-0.4
	109	TRUE	Empty	Dolichyl-diphosphooligosaccharide--protein glycosyltransferase 48 kDa subunit OS=Homo sapiens GN=DDOST PE=1 SV=4	P39656	51 kDa		75% (0.097)	unknown	0	1.1	1.5	1.3	0.8	0.5	-0.8	-0.6
	110	TRUE	Empty	40S ribosomal protein S28 OS=Homo sapiens GN=RPS28 PE=1 SV=1	P62857	8 kDa		0% (0.10)	unknown	0	1.6	1.3	0.9	1.4	0.7	0.4	0.5
	111	TRUE	Empty	Serum albumin OS=Homo sapiens GN=ALB PE=1 SV=2	P02768	69 kDa		75% (0.10)	unknown	0	0.9	0.6	0.1	0.4	-0.2	-0.1	0.2
	112	TRUE	Empty	UV excision repair protein RAD23 homolog B OS=Homo sapiens GN=RAD23B PE=1 SV=1	P54727	43 kDa		75% (0.11)	unknown	0	1.6	2.2	1.7	1.8	-0.1	0.1	-0.4
	113	TRUE	Empty	Procollagen-lysine,2-oxoglutarate 5-dioxygenase 2 OS=Homo sapiens GN=PLOD2 PE=1 SV=2	O00469	85 kDa		75% (0.11)	unknown	0	1.5	1.7	1.6	1.5	0	0	-0.4
	114	TRUE	Empty	Lamin-B2 OS=Homo sapiens GN=LMNB2 PE=1 SV=3	Q03252	68 kDa	TRUE	0% (0.12)	unknown	0	1.2	1.1	0.9	1.3	-0.2	0.2	-0.6
	115	TRUE	Empty	Calponin-2 OS=Homo sapiens GN=CNN2 PE=1 SV=4	Q99439	34 kDa	TRUE	0% (0.12)	unknown	0	1.8	1.3	1.5	1.8	0.6	1	1.3
	116	TRUE	Empty	PDZ and LIM domain protein 1 OS=Homo sapiens GN=PDLIM1 PE=1 SV=4	O00151	36 kDa		0% (0.12)	unknown	0	1.8	1.6	2.1	1.3	-0.2	-0.4	0.4
	117	TRUE	Empty	Lactotransferrin OS=Homo sapiens GN=LTF PE=1 SV=6	P02788	78 kDa	TRUE	0% (0.12)	unknown	0	1.2	1.2	0.9	1.3	0.6	0.7	0.4
	118	TRUE	Empty	Protein DJ-1 OS=Homo sapiens GN=PARK7 PE=1 SV=2	Q99497	20 kDa		75% (0.12)	unknown	0	0.4	0.8	0.4	0.9	0.1	0.5	-0.1
	119	TRUE	Empty	Lamin-B1 OS=Homo sapiens GN=LMNB1 PE=1 SV=2	P20700	66 kDa	TRUE	0% (0.12)	unknown	0	0.8	1.1	0.9	1.4	0.1	-0.1	-0.7
	120	TRUE	Empty	Calponin-3 OS=Homo sapiens GN=CNN3 PE=1 SV=1	Q15417	36 kDa	TRUE	0% (0.13)	unknown	0	1.5	0.9	1.1	1.1	-0.6	0.3	-0.1
	121	TRUE	Empty	Reticulon-4 OS=Homo sapiens GN=RTN4 PE=1 SV=2	Q9NQC3	130 kDa		0% (0.13)	unknown	0	2.4	2.4	1.8	1.9	1.1	1.3	0.6
	123	TRUE	Empty	Superoxide dismutase [Cu-Zn] OS=Homo sapiens GN=SOD1 PE=1 SV=2	P00441	16 kDa		0% (0.14)	unknown	0	0.5	1.1	1	1.2	0	0.3	0.8
	124	TRUE	Empty	Hemoglobin subunit beta OS=Homo sapiens GN=HBB PE=1 SV=2 (P68871)	P68871	16 kDa	TRUE	0% (0.14)	unknown	0	1.1	0.7	0.5	1.1	0.7	0.1	0.3
	125	TRUE	Empty	Elongation factor Tu, mitochondrial OS=Homo sapiens GN=TUFM PE=1 SV=2	P49411	50 kDa		75% (0.14)	unknown	0	1.9	2.3	1.3	2.4	-1	0.9	0.9
	126	TRUE	Empty	Tubulin alpha-1B chain OS=Homo sapiens GN=TUBA1B PE=1 SV=1 (P68363)	P68363	50 kDa	TRUE	0% (0.15)	unknown	0	0.7	0.7	0.2	0.7	-0.2	-0.3	-0.3
	127	TRUE	Empty	Microtubule-associated protein 4 OS=Homo sapiens GN=MAP4 PE=1 SV=3	P27816	121 kDa		0% (0.15)	unknown	0	0.7	1	0.9	1	0	0.4	-0.2
	128	TRUE	Empty	Acetyl-CoA acetyltransferase, cytosolic OS=Homo sapiens GN=ACAT2 PE=1 SV=2	Q9BWD1	41 kDa		0% (0.15)	unknown	0	0.3	0	0.3	1.3	-0.3	-1	-0.9
	129	TRUE	Empty	RNA-binding protein 14 OS=Homo sapiens GN=RBM14 PE=1 SV=2	Q96PK6	69 kDa		0% (0.15)	unknown	0	1.7	2.2	2.5	1.9	1.1	0.9	-0.1
	130	TRUE	Empty	Transcription intermediary factor 1-beta OS=Homo sapiens GN=TRIM28 PE=1 SV=5	Q13263	89 kDa		75% (0.15)	unknown	0	1.1	0.7	1.2	1.2	-0.8	-1.2	-1.2
	131	TRUE	Empty	40S ribosomal protein S21 OS=Homo sapiens GN=RPS21 PE=1 SV=1	P63220	9 kDa		0% (0.16)	unknown	0	1.3	1.2	0.6	1.4	0.3	0.3	1.1
	132	TRUE	Empty	UPF0568 protein C14orf166 OS=Homo sapiens GN=C14orf166 PE=1 SV=1	Q9Y224	28 kDa		75% (0.16)	unknown	0	0.4	1.3	1.1	0.9	0.7	0.2	-2.1
	133	TRUE	Empty	X-ray repair cross-complementing protein 6 OS=Homo sapiens GN=XRCC6 PE=1 SV=2	P12956	70 kDa		0% (0.16)	unknown	0	0.6	1.9	1.3	1.4	1.6	0	1
	134	TRUE	Empty	Thrombospondin-1 OS=Homo sapiens GN=THBS1 PE=1 SV=2 (P07996)	P07996	129 kDa	TRUE	0% (0.16)	unknown	0	2.3	2.4	2.3	2	0.9	0.8	1.1
	135	TRUE	Empty	Membrane-associated progesterone receptor component 1 OS=Homo sapiens GN=PGRMC1 PE=1 SV=3	O00264	22 kDa		75% (0.16)	unknown	0	0.9	1	2.4	3.1	-0.7	0.7	-0.8
	136	TRUE	Empty	40S ribosomal protein S4, X isoform OS=Homo sapiens GN=RPS4X PE=1 SV=2	P62701	30 kDa		0% (0.17)	unknown	0	1.1	0.9	1	1.6	0	0	-0.2
	137	TRUE	Empty	Eukaryotic translation initiation factor 5A-1 OS=Homo sapiens GN=EIF5A PE=1 SV=2	P63241	17 kDa		0% (0.17)	unknown	0	-0.1	0.4	0.4	0.5	-0.1	0.3	0.2
	138	TRUE	Empty	Proliferating cell nuclear antigen OS=Homo sapiens GN=PCNA PE=1 SV=1	P12004	29 kDa		0% (0.17)	unknown	0	-0.4	-0.6	-0.5	-0.3	-0.5	0.3	-0.2
	139	TRUE	Empty	Nucleophosmin OS=Homo sapiens GN=NPM1 PE=1 SV=2	P06748	33 kDa		0% (0.17)	unknown	0	0.2	0.1	-0.3	-0.1	0	-0.1	0.5
	140	TRUE	Empty	Serine protease HTRA1 OS=Homo sapiens GN=HTRA1 PE=1 SV=1	Q92743	51 kDa		0% (0.17)	unknown	0	0.3	1.4	1.7	1.7	0.6	0.7	-0.2
	141	TRUE	Empty	40S ribosomal protein S25 OS=Homo sapiens GN=RPS25 PE=1 SV=1	P62851	14 kDa		0% (0.18)	unknown	0	0.8	0.7	0.7	0.8	0	0	-0.2
	142	TRUE	Empty	Tumor protein D54 OS=Homo sapiens GN=TPD52L2 PE=1 SV=2	O43399	22 kDa		0% (0.19)	unknown	0	1	1.1	1.3	-0.2	-0.9	-0.4	0.3
	143	TRUE	Empty	Ran-specific GTPase-activating protein OS=Homo sapiens GN=RANBP1 PE=1 SV=1	P43487	23 kDa		0% (0.19)	unknown	0	-0.2	0.2	0	-0.9	0.1	-1.1	-1.1
	144	TRUE	Empty	Polyadenylate-binding protein 3 OS=Homo sapiens GN=PABPC3 PE=1 SV=2 (Q9H361)	Q9H361	70 kDa	TRUE	0% (0.20)	unknown	0	0.6	0.6	0.4	0.5	-0.3	-0.2	-0.1
	145	TRUE	Empty	Phosphoglycerate mutase 2 OS=Homo sapiens GN=PGAM2 PE=1 SV=3 (P15259)	P15259	29 kDa	TRUE	0% (0.20)	unknown	0	0.6	1.1	0.8	0.9	0.3	0.5	-0.3
	146	TRUE	Empty	60S ribosomal protein L31 OS=Homo sapiens GN=RPL31 PE=1 SV=1	P62899	14 kDa		0% (0.21)	unknown	0	1.3	1.5	1.3	1.7	1.1	1.2	0.8
	147	TRUE	Empty	Small nuclear ribonucleoprotein G-like protein OS=Homo sapiens PE=3 SV=2	A8MWD9	9 kDa		0% (0.21)	unknown	0	0.9	1.3	1.7	1.2	-0.7	-0.5	0.3
	148	TRUE	Empty	Lactoylglutathione lyase OS=Homo sapiens GN=GLO1 PE=1 SV=4	Q04760	21 kDa		0% (0.21)	unknown	0	0.9	1.1	1.1	1.2	1	1.3	-0.2
	149	TRUE	Empty	Cytochrome c oxidase subunit 2 OS=Homo sapiens GN=MT-CO2 PE=1 SV=1	P00403	26 kDa		0% (0.22)	unknown	0	1.5	2	1.2	1.1	0.2	-1.5	-0.9
	150	TRUE	Empty	Calmodulin OS=Homo sapiens GN=CALM1 PE=1 SV=2 (P62158)	P62158	17 kDa	TRUE	0% (0.22)	unknown	0	0.4	0.5	0.7	0.6	-0.4	0.2	-0.1
	151	TRUE	Empty	High mobility group protein B2 OS=Homo sapiens GN=HMGB2 PE=1 SV=2	P26583	24 kDa	TRUE	0% (0.22)	unknown	0	1	1.6	0.2	0.6	-1.9	0.6	0.6
	152	TRUE	Empty	Annexin A1 OS=Homo sapiens GN=ANXA1 PE=1 SV=2	P04083	39 kDa		0% (0.23)	unknown	0	0.4	0.3	0.2	0.5	-0.1	-0.2	0
	153	TRUE	Empty	Peptidyl-prolyl cis-trans isomerase B OS=Homo sapiens GN=PPIB PE=1 SV=2	P23284	24 kDa	TRUE	0% (0.23)	unknown	0	0.2	-0.1	0	-0.1	0.1	-0.5	-0.2
	154	TRUE	Empty	Ubiquitin-associated protein 2-like OS=Homo sapiens GN=UBAP2L PE=1 SV=2	Q14157	115 kDa		0% (0.23)	unknown	0	0.5	0.9	0.5	0.5	-0.6	0	0.8
	155	TRUE	Empty	Nucleoside diphosphate kinase B OS=Homo sapiens GN=NME2 PE=1 SV=1	P22392	17 kDa	TRUE	0% (0.23)	unknown	0	0.6	0.6	-0.1	0.4	-1.5	-0.8	-0.7
	156	TRUE	Empty	60S ribosomal protein L27 OS=Homo sapiens GN=RPL27 PE=1 SV=2	P61353	16 kDa		0% (0.24)	unknown	0	0.7	0.7	0.7	1.7	0.8	1.6	0.1
	157	TRUE	Empty	RNA-binding motif protein, X chromosome OS=Homo sapiens GN=RBMX PE=1 SV=3	P38159	42 kDa	TRUE	0% (0.24)	unknown	0	1.3	0.8	1.4	1.5	-1.1	-0.4	0
	158	TRUE	Empty	High mobility group protein B1 OS=Homo sapiens GN=HMGB1 PE=1 SV=3 (P09429)	P09429	25 kDa	TRUE	0% (0.24)	unknown	0	-0.1	-0.2	-0.2	0.2	0	0.3	0.4
	159	TRUE	Empty	40S ribosomal protein S18 OS=Homo sapiens GN=RPS18 PE=1 SV=3	P62269	18 kDa		0% (0.26)	unknown	0	0.9	0.8	0.6	1	0	0.1	-0.2
	160	TRUE	Empty	60S ribosomal protein L29 OS=Homo sapiens GN=RPL29 PE=1 SV=2	P47914	18 kDa		0% (0.27)	unknown	0	1	-0.1	0	1.1	-0.8	-0.3	-0.9
	161	TRUE	Empty	PDZ and LIM domain protein 7 OS=Homo sapiens GN=PDLIM7 PE=1 SV=1	Q9NR12	50 kDa		75% (0.27)	unknown	0	1.6	#VALUE!	1.2	1.6	-0.8	-0.2	-0.4
	162	TRUE	Empty	Nucleoside diphosphate kinase A OS=Homo sapiens GN=NME1 PE=1 SV=1	P15531	17 kDa	TRUE	0% (0.27)	unknown	0	0.8	1.2	0.8	1.2	0.5	1	0.1
	163	TRUE	Empty	Histone H4 OS=Homo sapiens GN=HIST1H4A PE=1 SV=2	P62805	11 kDa	TRUE	0% (0.28)	unknown	0	0.8	0.7	0.7	1	0.4	0.4	0.5
	164	TRUE	Empty	Transmembrane protein 109 OS=Homo sapiens GN=TMEM109 PE=1 SV=1	Q9BVC6	26 kDa		75% (0.29)	unknown	0	1.1	2.1	2.1	#VALUE!	-0.5	1.9	2
	165	TRUE	Empty	ATP synthase subunit b, mitochondrial OS=Homo sapiens GN=ATP5F1 PE=1 SV=2	P24539	29 kDa		0% (0.29)	unknown	0	1.5	1.9	2.1	2.1	0.5	-1.1	0.8
	166	TRUE	Empty	LIM and SH3 domain protein 1 OS=Homo sapiens GN=LASP1 PE=1 SV=2	Q14847	30 kDa		0% (0.30)	unknown	0	0.4	2.5	0.3	2.2	-0.4	0.9	-0.1
	167	TRUE	Empty	Protein S100-A13 OS=Homo sapiens GN=S100A13 PE=1 SV=1	Q99584	11 kDa		0% (0.30)	unknown	0	0.5	0.5	-0.3	0.7	-0.5	0.4	0.5
	168	TRUE	Empty	TATA-binding protein-associated factor 2N OS=Homo sapiens GN=TAF15 PE=1 SV=1	Q92804	62 kDa	TRUE	0% (0.30)	unknown	0	0	0.4	0.9	0.9	-0.8	0.1	-0.2
	169	TRUE	Empty	40S ribosomal protein S7 OS=Homo sapiens GN=RPS7 PE=1 SV=1	P62081	22 kDa		0% (0.31)	unknown	0	0.2	0.6	0.8	0.4	-0.3	-0.4	-0.2
	170	TRUE	Empty	Ubiquitin-60S ribosomal protein L40 OS=Homo sapiens GN=UBA52 PE=1 SV=2	P62987	15 kDa	TRUE	0% (0.32)	unknown	0	0.8	0.9	1	1.2	0.1	0.6	0.9
	171	TRUE	Empty	26S proteasome non-ATPase regulatory subunit 11 OS=Homo sapiens GN=PSMD11 PE=1 SV=3	O00231	47 kDa		0% (0.33)	unknown	0	0.9	1.3	1.1	1.6	-0.3	-0.6	-0.7
	172	TRUE	Empty	Protein S100-A10 OS=Homo sapiens GN=S100A10 PE=1 SV=2	P60903	11 kDa		0% (0.33)	unknown	0	0.9	1	0.9	1	0.2	0.3	0.6
	173	TRUE	Empty	Catenin alpha-1 OS=Homo sapiens GN=CTNNA1 PE=1 SV=1	P35221	100 kDa		0% (0.34)	unknown	0	1.3	1.6	1.7	1.7	-0.4	0.7	0.4
	174	TRUE	Empty	40S ribosomal protein S15a OS=Homo sapiens GN=RPS15A PE=1 SV=2	P62244	15 kDa		0% (0.36)	unknown	0	0.9	0.5	0	0.8	0.6	-0.7	-0.9
	175	TRUE	Empty	60S ribosomal protein L14 OS=Homo sapiens GN=RPL14 PE=1 SV=4	P50914	23 kDa		0% (0.36)	unknown	0	0	-0.6	-0.9	-0.6	0	-0.3	-0.5
	176	TRUE	Empty	Thioredoxin OS=Homo sapiens GN=TXN PE=1 SV=3	P10599	12 kDa		0% (0.36)	unknown	0	0.9	0.7	0.6	0.7	0.1	0.6	0.8
	177	TRUE	Empty	Calumenin OS=Homo sapiens GN=CALU PE=1 SV=2	O43852	37 kDa		0% (0.36)	unknown	0	0.3	1.2	0.2	0.5	-0.4	-0.4	0.1
	178	TRUE	Empty	Tropomyosin alpha-3 chain OS=Homo sapiens GN=TPM3 PE=1 SV=2	P06753	33 kDa	TRUE	0% (0.36)	unknown	0	0.6	1	0.8	0.8	-0.2	0	0.6
	179	TRUE	Empty	60S ribosomal protein L32 OS=Homo sapiens GN=RPL32 PE=1 SV=2	P62910	16 kDa		0% (0.37)	unknown	0	1.1	1.2	1	1.4	0.3	-0.9	0.2
	180	TRUE	Empty	40S ribosomal protein S10 OS=Homo sapiens GN=RPS10 PE=1 SV=1	P46783	19 kDa	TRUE	0% (0.38)	unknown	0	1.2	1.4	1.2	0.8	0.6	-1.5	0.1
	181	TRUE	Empty	Protein CYR61 OS=Homo sapiens GN=CYR61 PE=1 SV=1	O00622	42 kDa		0% (0.41)	unknown	0	1.6	1.5	0.9	1.1	0.6	1.3	1.2
	182	TRUE	Empty	Parathymosin OS=Homo sapiens GN=PTMS PE=1 SV=2	P20962	12 kDa		0% (0.42)	unknown	0	0.6	0.7	0.5	0.7	-0.2	0.2	0.2
	183	TRUE	Empty	Elongation factor 1-gamma OS=Homo sapiens GN=EEF1G PE=1 SV=3	P26641	50 kDa		0% (0.43)	unknown	0	0.1	0.6	0.4	0.8	-2.1	0.1	-2.3
	184	TRUE	Empty	Alpha-2-macroglobulin OS=Homo sapiens GN=A2M PE=1 SV=3 (P01023)	P01023	163 kDa	TRUE	0% (0.43)	unknown	0	0.3	0	0.1	0.7	-0.9	-1.3	-0.1
	185	TRUE	Empty	Destrin OS=Homo sapiens GN=DSTN PE=1 SV=3	P60981	19 kDa	TRUE	0% (0.43)	unknown	0	1.5	1.9	1	1.7	0.2	-0.6	0.9
	186	TRUE	Empty	Putative tropomyosin alpha-3 chain-like protein OS=Homo sapiens PE=5 SV=2	A6NL28	26 kDa	TRUE	0% (0.43)	unknown	0	1.1	1.2	-1	-1.2	0.2	0	-3.3
	187	TRUE	Empty	Keratin, type II cytoskeletal 1 OS=Homo sapiens GN=KRT1 PE=1 SV=6	P04264	66 kDa	TRUE	0% (0.43)	unknown	0	2.2	2.4	1.9	2.3	0.1	-1.6	0.6
	188	TRUE	Empty	Acidic leucine-rich nuclear phosphoprotein 32 family member A OS=Homo sapiens GN=ANP32A PE=1 SV=1	P39687	29 kDa	TRUE	0% (0.43)	unknown	0	5.2	4.7	3.1	4.7	0.1	3.8	1.4
	189	TRUE	Empty	Protein S100-A6 OS=Homo sapiens GN=S100A6 PE=1 SV=1	P06703	10 kDa		0% (0.48)	unknown	0	0.6	0.1	0.1	0.4	0.1	0.4	0.6
	190	TRUE	Empty	Acidic leucine-rich nuclear phosphoprotein 32 family member B OS=Homo sapiens GN=ANP32B PE=1 SV=1	Q92688	29 kDa	TRUE	0% (0.49)	unknown	0	0.7	0.7	0.1	0.2	0.1	0	0.9
	191	TRUE	Empty	Heterogeneous nuclear ribonucleoprotein D0 OS=Homo sapiens GN=HNRNPD PE=1 SV=1 (Q14103)	Q14103	38 kDa	TRUE	0% (0.50)	unknown	0	0.7	1.1	0.8	1	0.1	0.2	0.4
	192	TRUE	Empty	Vinculin OS=Homo sapiens GN=VCL PE=1 SV=4	P18206	124 kDa		0% (0.51)	unknown	0	0.4	0.3	0.1	0	-0.8	0.4	-0.1
	193	TRUE	Empty	Non-histone chromosomal protein HMG-14 OS=Homo sapiens GN=HMGN1 PE=1 SV=3	P05114	11 kDa		0% (0.51)	unknown	0	0.4	0.1	0	0.4	-0.3	-0.5	0.2
	194	TRUE	Empty	Superoxide dismutase [Mn], mitochondrial OS=Homo sapiens GN=SOD2 PE=1 SV=2	P04179	25 kDa		0% (0.51)	unknown	0	-0.3	1	0.2	0.9	-1.2	-2.4	0.8
	195	TRUE	Empty	Heterogeneous nuclear ribonucleoprotein A1 OS=Homo sapiens GN=HNRNPA1 PE=1 SV=5	P09651	39 kDa	TRUE	0% (0.52)	unknown	0	0.6	0.9	0.9	0.8	0.1	0.1	0.6
	196	TRUE	Empty	Myristoylated alanine-rich C-kinase substrate OS=Homo sapiens GN=MARCKS PE=1 SV=4	P29966	32 kDa		0% (0.55)	unknown	0	1.4	0.9	1.1	1.3	0.1	0.3	0.5
	197	TRUE	Empty	Eukaryotic translation initiation factor 4B OS=Homo sapiens GN=EIF4B PE=1 SV=2	P23588	69 kDa		0% (0.56)	unknown	0	0.4	-0.1	0.1	0.2	-0.9	-0.8	0.1
	198	TRUE	Empty	T-complex protein 1 subunit beta OS=Homo sapiens GN=CCT2 PE=1 SV=4	P78371	57 kDa		75% (0.57)	unknown	0	0.8	#VALUE!	#VALUE!	#VALUE!	-2.9	-0.3	0.1
	199	TRUE	Empty	Myosin regulatory light chain 12B OS=Homo sapiens GN=MYL12B PE=1 SV=2	O14950	20 kDa		0% (0.58)	unknown	0	0.6	0.5	0.3	0.7	-0.1	0.2	0.4
	200	TRUE	Empty	Peroxiredoxin-1 OS=Homo sapiens GN=PRDX1 PE=1 SV=1	Q06830	22 kDa		0% (0.58)	unknown	0	1.4	1.1	1	1.3	0.7	1.1	0.4
	201	TRUE	Empty	Cell surface glycoprotein MUC18 OS=Homo sapiens GN=MCAM PE=1 SV=2	P43121	72 kDa		0% (0.59)	unknown	0	0.1	0.7	0.2	0.8	0.2	-0.4	0
	202	TRUE	Empty	Vitronectin OS=Homo sapiens GN=VTN PE=1 SV=1	P04004	54 kDa		0% (0.60)	unknown	0	0.8	0.4	0.3	0.5	0.1	0.2	-0.3
	203	TRUE	Empty	Heterogeneous nuclear ribonucleoprotein M OS=Homo sapiens GN=HNRNPM PE=1 SV=3	P52272	78 kDa		0% (0.62)	unknown	0	1.1	1.1	1	1.5	0	0.4	0.2
	204	TRUE	Empty	Histone H2A.Z OS=Homo sapiens GN=H2AFZ PE=1 SV=2	P0C0S5	14 kDa	TRUE	0% (0.63)	unknown	0	1	0.9	0.5	0.7	0.6	0.1	0.2
	205	TRUE	Empty	Spectrin beta chain, non-erythrocytic 4 OS=Homo sapiens GN=SPTBN4 PE=1 SV=2	Q9H254	289 kDa	TRUE	0% (0.66)	unknown	0	#VALUE!	-0.6	#VALUE!	-0.3	-0.1	-1.3	0.5
	206	TRUE	Empty	Tropomyosin alpha-1 chain OS=Homo sapiens GN=TPM1 PE=1 SV=2	P09493	33 kDa	TRUE	0% (0.67)	unknown	0	0.7	0.5	0.5	0.5	0.3	0.5	0.4
	207	TRUE	Empty	Histone H2A type 2-B OS=Homo sapiens GN=HIST2H2AB PE=1 SV=3 (Q8IUE6)	Q8IUE6	14 kDa	TRUE	0% (0.67)	unknown	0	1.5	1.9	-1.1	-3.8	0	-0.3	-0.1
	208	TRUE	Empty	ATP synthase subunit alpha, mitochondrial OS=Homo sapiens GN=ATP5A1 PE=1 SV=1	P25705	60 kDa		0% (0.70)	unknown	0	1.8	0.3	0.4	1.2	0.9	-1.5	-0.3
	209	TRUE	Empty	Histone H3.1 OS=Homo sapiens GN=HIST1H3A PE=1 SV=2	P68431	15 kDa		0% (0.72)	unknown	0	0.5	0.3	0.4	0.7	0	0.1	0
	210	TRUE	Empty	Brain acid soluble protein 1 OS=Homo sapiens GN=BASP1 PE=1 SV=2	P80723	23 kDa		0% (0.76)	unknown	0	0.4	0.7	1	0.6	0.6	0.8	0.3
	211	TRUE	Empty	Histone H1.5 OS=Homo sapiens GN=HIST1H1B PE=1 SV=3 (P16401)	P16401	23 kDa	TRUE	0% (0.76)	unknown	0	0.2	0.3	-0.1	0.3	0.3	0.2	0.6
	212	TRUE	Empty	Prothymosin alpha OS=Homo sapiens GN=PTMA PE=1 SV=2	P06454	12 kDa		0% (0.78)	unknown	0	-0.1	-0.4	-0.2	-0.2	-0.2	0.2	0.6
	213	TRUE	Empty	rRNA 2'-O-methyltransferase fibrillarin OS=Homo sapiens GN=FBL PE=1 SV=2	P22087	34 kDa		0% (0.96)	unknown	0	2.6	1.9	1.6	2.3	0.3	0.3	0.3
	214	TRUE	Empty	60S acidic ribosomal protein P2 OS=Homo sapiens GN=RPLP2 PE=1 SV=1	P05387	12 kDa		0% (0.97)	unknown	0	0.2	0	-0.3	-0.3	0	0.2	0.2
	215	TRUE	Empty	Histone H2B type 1-K OS=Homo sapiens GN=HIST1H2BK PE=1 SV=3 (O60814)	O60814	14 kDa	TRUE	0% (0.97)	unknown	0	0.7	0.9	0.8	0.8	0.4	0.5	0.4
	END OF FILE
